# Supplementary material for: The Antimicrobial Effects of Bacterial Cellulose Produced by Komagataeibacter intermedius in Promoting Wound Healing in Diabetic Mice
Source: MDPI journal article supplement (doi:10.3390/ijms23105456), 2022-05-13
Supplement: s1 [file s1]

Table S1. The Abbreviations of Skin Surface characteristics in this manuscript.

| <b>Abbreviations</b> | <b>Definition</b>                                                                                              |
|----------------------|----------------------------------------------------------------------------------------------------------------|
| CIE-a*               | Commission Internationale d'Eclairage a*: the value of green-red color on the detected wounds.                 |
| CIE-b*               | Commission Internationale d'Eclairage b*: the value of blue-yellow color on the detected wounds.               |
| CIE-L*               | Commission Internationale d'Eclairage L*: the value of white color on the detected wounds.                     |
| RH                   | Relative humidity: The relative humidity of the wounds                                                         |
| TEWL                 | Transdermal water loss: The amount of water that passively evaporates through skin to the external environment |
| Wound R.             | Wound recovery: The recovery rate of the wounds                                                                |
